# Supplementary material for: ACHIEVEMENTS OF NUCLEAR SPECTROSCOPY IN SOVIET LATVIA.
Source: MDPI journal article supplement (doi:10.3390/ijms232415698), 1969-01-01
Supplement: s1 [file s1]

## **1. Supplementary Methods**

### **1.1 Identification of differentially expressed genes (DEGs) and common gene identification between SARS-CoV-2 and m<sup>6</sup>A modification (METTL3)**

The identification of DEGs from GSE167075 dataset (<https://www.ncbi.nlm.nih.gov/geo/query/acc.cgi?acc=GSE167075>) <sup>1</sup> was performed through using the R programming language. Adjusted P-value < 0.05 and  $|\log_2FC| \geq 1$  was regarded as cutoff criteria to obtain significant DEGs from all the datasets. The common genes among GSE164571, GSE147507 and GSE167075 datasets were identified through a Venn diagram online tool called jvenn <sup>2</sup>.

### **1.2 Acquisition and classification of immune-related genes**

A list of immune-related genes was obtained from the ImmPort website (<https://www.immport.org/shared/genelists>) <sup>3</sup>. Classification of immune-related genes was visualized by R package ggalluvial <sup>4</sup>.

## **2. Supplementary figure legends**

**Figure S1. The related pathways of coronavirus disease (COVID-19) from KEGG.** Enriched genes from common DEGs were marked by red circles.

**Figure S2. Identification of DEGs and screening of common DEGs between SARS-CoV-2 and m<sup>6</sup>A modification (METTL3).** (A) The Venn diagram showed the common DEGs among GSE164571, GSE147507 and GSE167075 datasets. The volcano plot depicted the DEGs between COVID-19 patients without cancer and healthy controls by using the GSE164571 (B) and GSE147507 (C) datasets (Adjusted P-value < 0.05,  $|\log_2FC| \geq 1$ ). (D) The volcano plot showed the DEGs between METTL3 depletion and

control by using GSE167075 dataset (Adjust P-value<0.05,  $|\log_2FC| \geq 1$ ). The common gene SERPINA1 was marked in the volcano plots.

### **3. Supplementary table legends**

**Table S1. The details of the patients from GSE153610 dataset.**

#### **Supplementary references**

1. Li N, Hui H, Bray B, et al. METTL3 regulates viral m6A RNA modification and host cell innate immune responses during SARS-CoV-2 infection. *Cell Rep.* May 11 2021;35(6):109091. doi:10.1016/j.celrep.2021.109091
2. Bardou P, Mariette J, Escudie F, Djemiel C, Klopp C. jvenn: an interactive Venn diagram viewer. *BMC Bioinformatics.* Aug 29 2014;15:293. doi:10.1186/1471-2105-15-293
3. Bhattacharya S, Andorf S, Gomes L, et al. ImmPort: disseminating data to the public for the future of immunology. *Immunol Res.* May 2014;58(2-3):234-9. doi:10.1007/s12026-014-8516-1
4. Brunson J. ggalluvial: Layered Grammar for Alluvial Plots. *Journal of Open Source Software.* 2020;5(49)doi:10.21105/joss.02017
