# Supplementary material for: Integrated Analysis of Bulk RNA-Seq and Single-Cell RNA-Seq Unravels the Influences of SARS-CoV-2 Infections to Cancer Patients
Source: Int J Mol Sci. 2022 Dec 10;23(24):15698. doi: 10.3390/ijms232415698 (PMC9779348; doi:10.3390/ijms232415698)
Supplement: Supplementary file 1 [file ijms-23-15698-s001.zip › Table S1.xlsm]

## Sheet: GSE153610_series_matrix
!Sample_title	Non-classical monocytes from infected patient 31037	Classical monocytes from infected patient 30947	Classical monocytes from infected patient 31037	Non-classical monocytes from recovered patient 30915	Non-classical monocytes from recovered patient 30916 (resequenced417)	Non-classical monocytes from recovered patient 30916 (resequenced420)	Non-classical monocytes from recovered patient 30916	Non-classical monocytes from recovered patient 30913 (resequenced)	Non-classical monocytes from recovered patient 30913	Classical monocytes from recovered patient 30916	Non-classical monocytes from recovered patient 30917	Classical monocytes from recovered patient 30913	Classical monocytes from recovered patient 30917	Classical monocytes from recovered patient 30915	Classical monocytes from recovered patient 30943	Classical monocytes from recovered patient 30969 (resequenced)	Classical monocytes from recovered patient 30969	Non-classical monocytes from recovered patient 30943	Non-classical monocytes from recovered patient 30969
!Sample_geo_accession	GSM4648023	GSM4648027	GSM4648028	GSM4648057	GSM4648060	GSM4648061	GSM4648062	GSM4648066	GSM4648067	GSM4648068	GSM4648075	GSM4648076	GSM4648077	GSM4648078	GSM4648079	GSM4648081	GSM4648082	GSM4648083	GSM4648084
!Sample_source_name_ch1	Non-classical monocytes from peripheral blood	Classical monocytes from peripheral blood	Classical monocytes from peripheral blood	Non-classical monocytes from peripheral blood	Non-classical monocytes from peripheral blood	Non-classical monocytes from peripheral blood	Non-classical monocytes from peripheral blood	Non-classical monocytes from peripheral blood	Non-classical monocytes from peripheral blood	Classical monocytes from peripheral blood	Non-classical monocytes from peripheral blood	Classical monocytes from peripheral blood	Classical monocytes from peripheral blood	Classical monocytes from peripheral blood	Classical monocytes from peripheral blood	Classical monocytes from peripheral blood	Classical monocytes from peripheral blood	Non-classical monocytes from peripheral blood	Non-classical monocytes from peripheral blood
!Sample_organism_ch1	Homo sapiens	Homo sapiens	Homo sapiens	Homo sapiens	Homo sapiens	Homo sapiens	Homo sapiens	Homo sapiens	Homo sapiens	Homo sapiens	Homo sapiens	Homo sapiens	Homo sapiens	Homo sapiens	Homo sapiens	Homo sapiens	Homo sapiens	Homo sapiens	Homo sapiens
!Sample_characteristics_ch1	covid status: Infected	covid status: Infected	covid status: Infected	covid status: Recovered	covid status: Recovered	covid status: Recovered	covid status: Recovered	covid status: Recovered	covid status: Recovered	covid status: Recovered	covid status: Recovered	covid status: Recovered	covid status: Recovered	covid status: Recovered	covid status: Recovered	covid status: Recovered	covid status: Recovered	covid status: Recovered	covid status: Recovered
!Sample_characteristics_ch1	gender: Female	gender: Female	gender: Female	gender: Female	gender: Male	gender: Male	gender: Male	gender: Male	gender: Male	gender: Male	gender: Male	gender: Male	gender: Male	gender: Female	gender: Female	gender: Male	gender: Male	gender: Female	gender: Male
!Sample_characteristics_ch1	age: 63	age: 31	age: 63	age: 57	age: 64	age: 64	age: 64	age: 76	age: 76	age: 64	age: 74	age: 76	age: 74	age: 57	age: 87	age: 48	age: 48	age: 87	age: 48
!Sample_characteristics_ch1	hospitalization: Yes	hospitalization: Yes	hospitalization: Yes	hospitalization: No	hospitalization: No	hospitalization: No	hospitalization: No	hospitalization: No	hospitalization: No	hospitalization: No	hospitalization: No	hospitalization: No	hospitalization: No	hospitalization: No	hospitalization: No	hospitalization: No	hospitalization: No	hospitalization: No	hospitalization: No
!Sample_characteristics_ch1	exitus: Yes	exitus: Yes	exitus: Yes	exitus: No	exitus: No	exitus: No	exitus: No	exitus: No	exitus: No	exitus: No	exitus: No	exitus: No	exitus: No	exitus: No	exitus: No	exitus: No	exitus: No	exitus: No	exitus: No
!Sample_characteristics_ch1	haematological tumor: Acute myeloid leukemia	haematological tumor: Diffuse large B-cell lymphoma	haematological tumor: Acute myeloid leukemia	haematological tumor: No	haematological tumor: No	haematological tumor: No	haematological tumor: No	haematological tumor: No	haematological tumor: No	haematological tumor: No	haematological tumor: No	haematological tumor: No	haematological tumor: No	haematological tumor: No	haematological tumor: No	haematological tumor: No	haematological tumor: No	haematological tumor: No	haematological tumor: No
!Sample_characteristics_ch1	number of cells: 15400	number of cells: 20000	number of cells: 20000	number of cells: 1300	number of cells: 1840	number of cells: 1840	number of cells: 1840	number of cells: 2790	number of cells: 2790	number of cells: 3000	number of cells: 11600	number of cells: 14400	number of cells: 14600	number of cells: 17300	number of cells: 20000	number of cells: 20000	number of cells: 20000	number of cells: 20000	number of cells: 20000
!Sample_molecule_ch1	total RNA	total RNA	total RNA	total RNA	total RNA	total RNA	total RNA	total RNA	total RNA	total RNA	total RNA	total RNA	total RNA	total RNA	total RNA	total RNA	total RNA	total RNA	total RNA
!Sample_description	31037_monosNC	30947_monos	31037_monos	30915_monosNC	30916_monosNC_reseq417	30916_monosNC_reseq420	30916_monosNC	30913_monosNC_reseq417	30913_monosNC	30916_monos	30917_monosNC	30913_monos	30917_monos	30915_monos	30943_monos	30969_monos_reseq	30969_monos	30943_monosNC	30969_monosNC
!Sample_description	31037_S7_R*_001.monosNC	30947_S2_R*_001.monos	31037_S8_R*_001.monos	30915_S22_R*_001.monosNC	30916_reseq412_S33_R*_001.monosNC	30916_reseq412_S3_R*_001.monosNC	30916_S19_R*_001.monosNC	30913_reseq412_S30_R*_001.monosNC	30913_S11_R*_001.monosNC	30916_S24_R*_001.monos	30917_S14_R*_001.monosNC	30913_S16_R*_001.monos	30917_S20_R*_001.monos	30915_S23_R*_001.monos	30943_S3_R*_001.monos	30969_reseq411_S25_R*_001.monos	30969_S6_R*_001.monos	30943_S17_R*_001.monosNC	30969_S1_R*_001.monosNC
!Sample_description	mRNA-3' from non-classical monocytes sorted from infected patient	mRNA-3' from classical monocytes sorted from infected patient	mRNA-3' from classical monocytes sorted from infected patient	mRNA-3' from non-classical monocytes sorted from recovered patient	mRNA-3' from non-classical monocytes sorted from recovered patient	mRNA-3' from non-classical monocytes sorted from recovered patient	mRNA-3' from non-classical monocytes sorted from recovered patient	mRNA-3' from non-classical monocytes sorted from recovered patient	mRNA-3' from non-classical monocytes sorted from recovered patient	mRNA-3' from classical monocytes sorted from recovered patient	mRNA-3' from non-classical monocytes sorted from recovered patient	mRNA-3' from classical monocytes sorted from recovered patient	mRNA-3' from classical monocytes sorted from recovered patient	mRNA-3' from classical monocytes sorted from recovered patient	mRNA-3' from classical monocytes sorted from recovered patient	mRNA-3' from classical monocytes sorted from recovered patient	mRNA-3' from classical monocytes sorted from recovered patient	mRNA-3' from non-classical monocytes sorted from recovered patient	mRNA-3' from non-classical monocytes sorted from recovered patient
!Sample_library_selection	cDNA	cDNA	cDNA	cDNA	cDNA	cDNA	cDNA	cDNA	cDNA	cDNA	cDNA	cDNA	cDNA	cDNA	cDNA	cDNA	cDNA	cDNA	cDNA
!Sample_library_source	transcriptomic	transcriptomic	transcriptomic	transcriptomic	transcriptomic	transcriptomic	transcriptomic	transcriptomic	transcriptomic	transcriptomic	transcriptomic	transcriptomic	transcriptomic	transcriptomic	transcriptomic	transcriptomic	transcriptomic	transcriptomic	transcriptomic
!Sample_library_strategy	RNA-Seq	RNA-Seq	RNA-Seq	RNA-Seq	RNA-Seq	RNA-Seq	RNA-Seq	RNA-Seq	RNA-Seq	RNA-Seq	RNA-Seq	RNA-Seq	RNA-Seq	RNA-Seq	RNA-Seq	RNA-Seq	RNA-Seq	RNA-Seq	RNA-Seq
ID_REF	GSM4648023	GSM4648027	GSM4648028	GSM4648057	GSM4648060	GSM4648061	GSM4648062	GSM4648066	GSM4648067	GSM4648068	GSM4648075	GSM4648076	GSM4648077	GSM4648078	GSM4648079	GSM4648081	GSM4648082	GSM4648083	GSM4648084
