# Supplementary figures and images for: ACHIEVEMENTS OF NUCLEAR SPECTROSCOPY IN SOVIET LATVIA.
Source: MDPI journal article supplement (doi:10.3390/ijms232415698), 1969-01-01

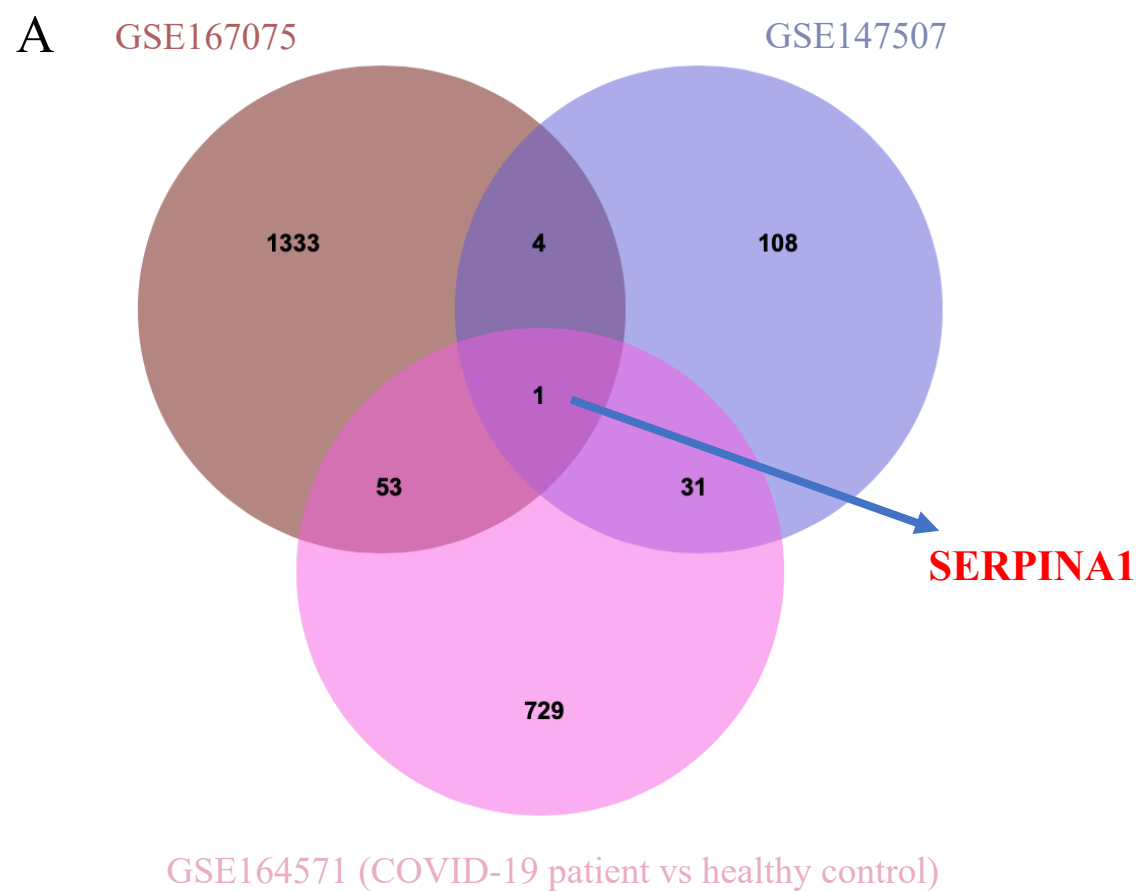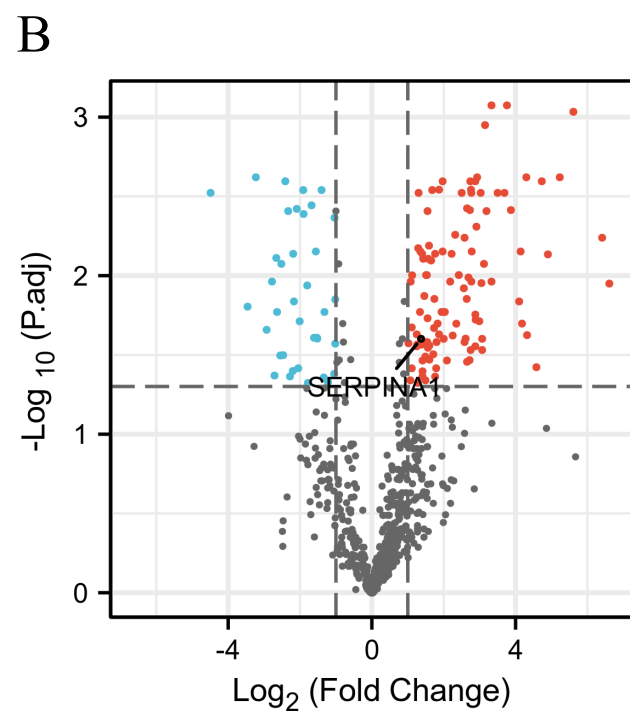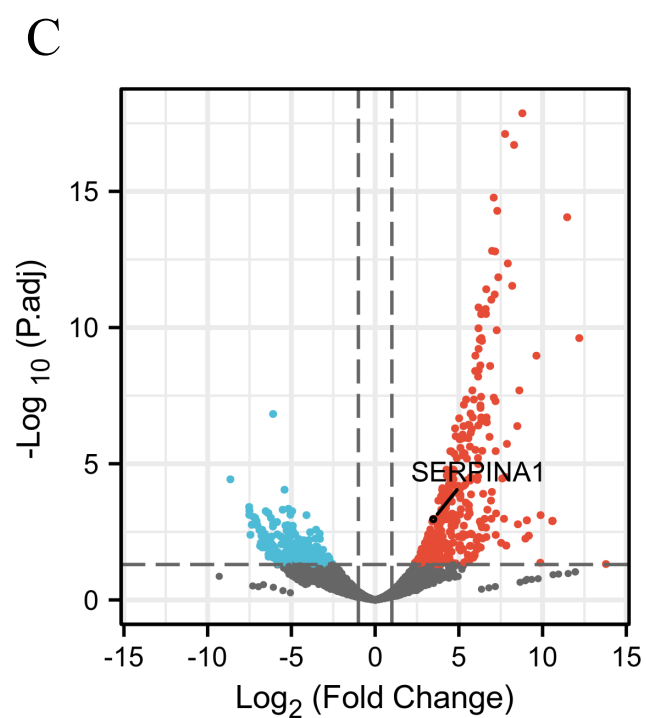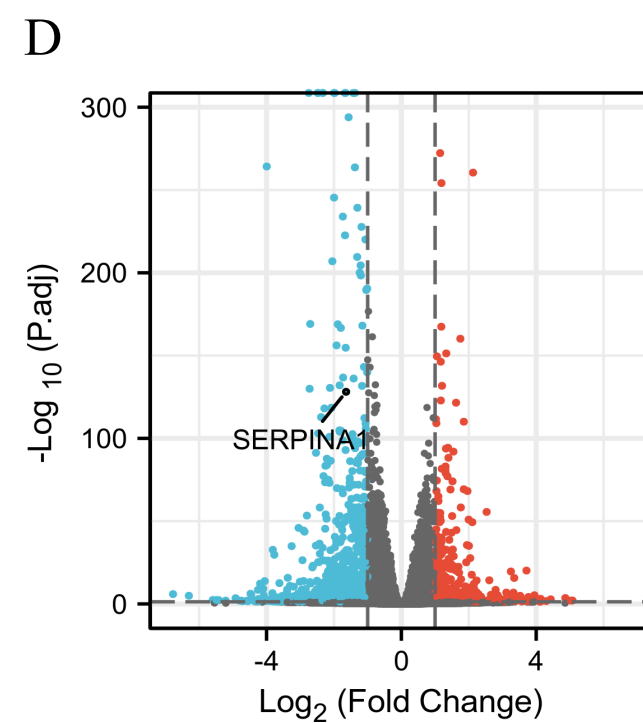

Supplement: s1 [file s1]

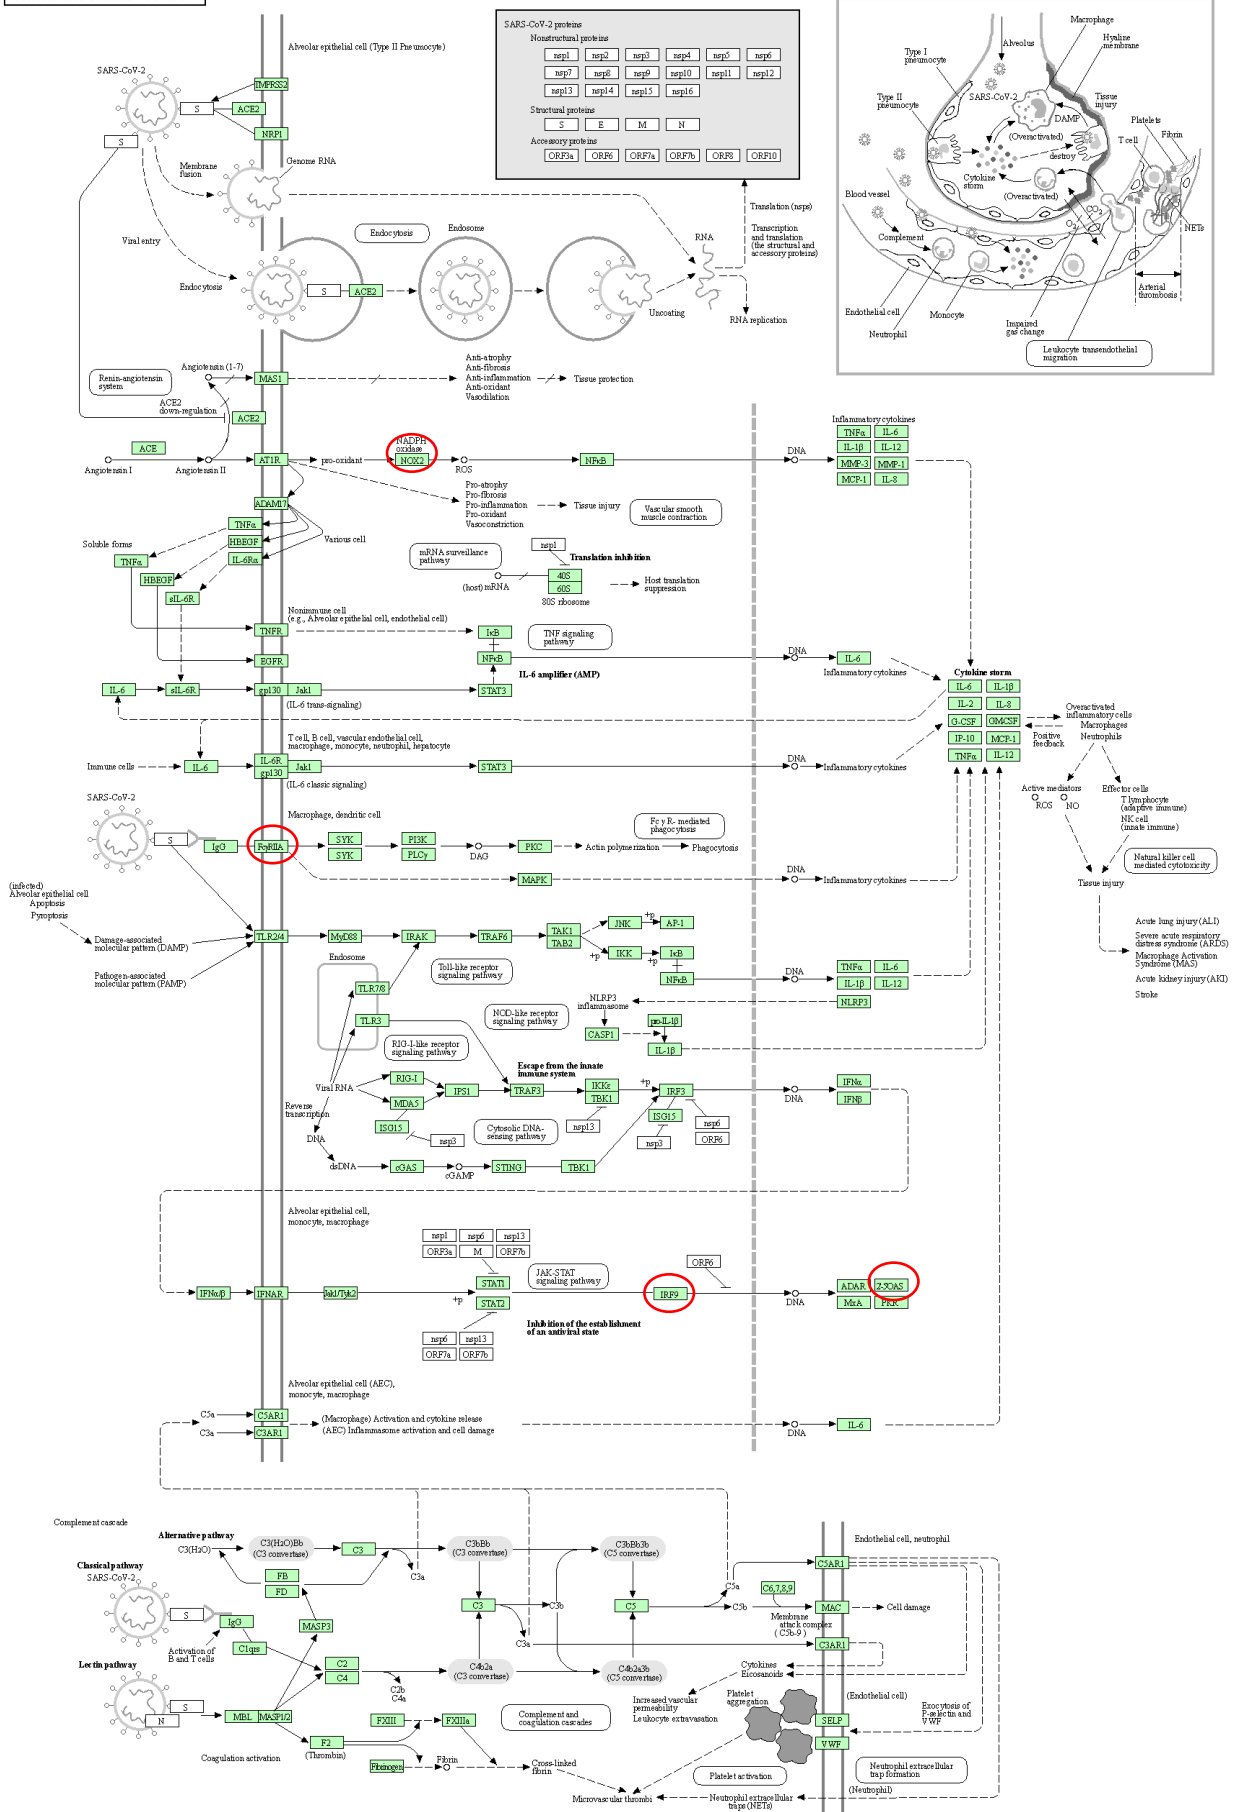

Supplement: s1 [file s1]
